# Supplementary material
Source: PubMed Central journal article supplement (PMC7486340)

## SUPPLEMENTS

### Supplementary Figure 1. The levels of IgG and IgM antibodies in hemodialysis patients (n=1,542).

Each dot represents the level of IgG and IgM antibody level for one patient from Guangdong (red) or Hubei (blue).

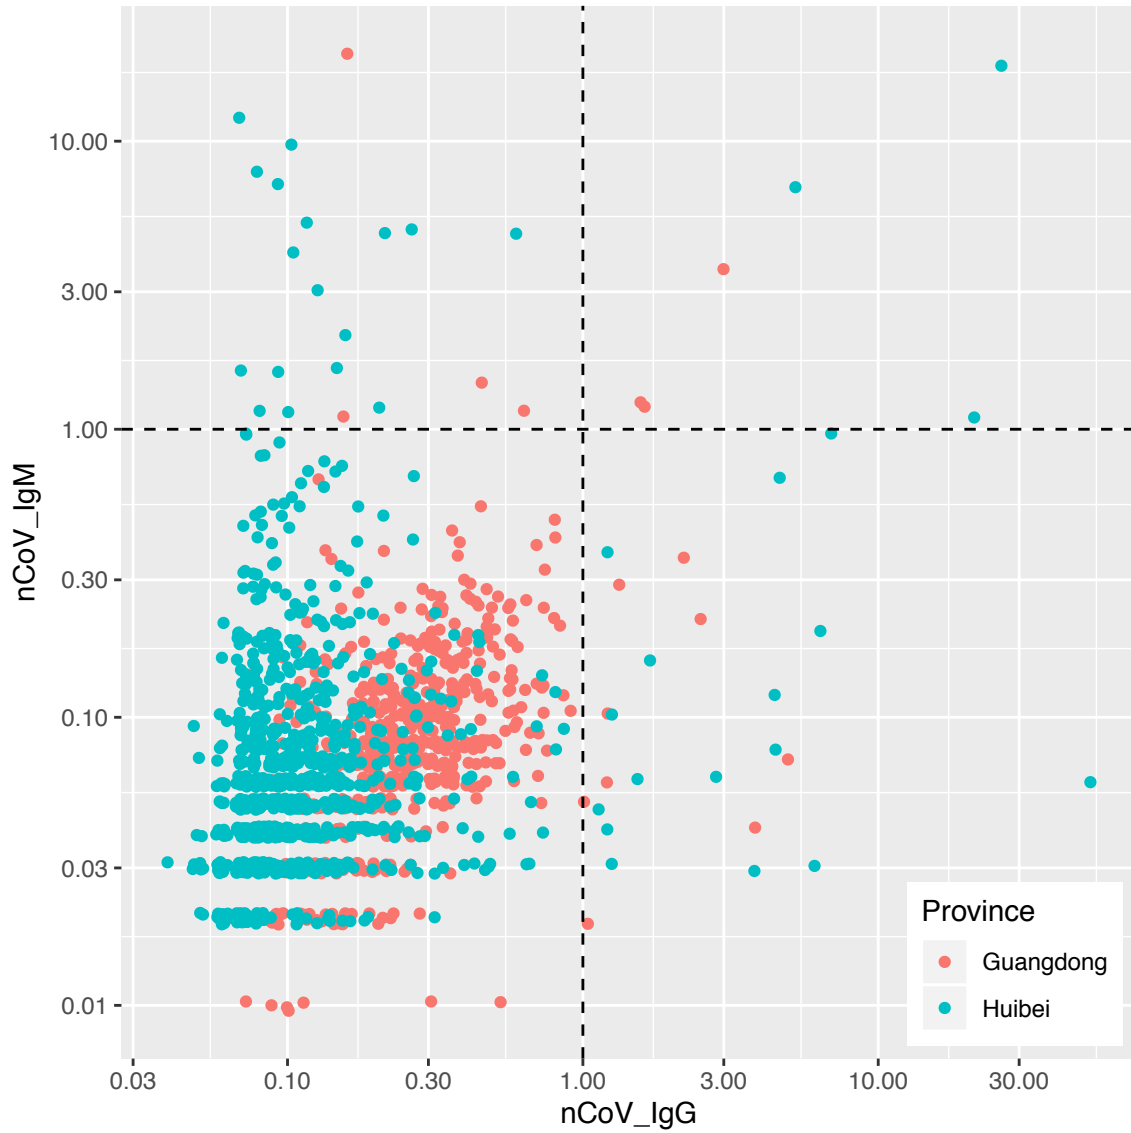

Supplement: mmc1.pdf [file mmc1.pdf]
